# Supplementary material for: Stretchable Triboelectric Fiber for Self-powered Kinematic Sensing Textile
Source: PubMed Central journal article supplement (PMC5057101; doi:10.1038/srep35153), 2016-10-11
Supplement: srep35153-s1.pdf [file srep35153-s1.pdf]

## Supporting Information

### Stretchable Triboelectric Fiber for Kinematic Sensing Textile

By Hyeon Jun Sim, Changsoon Choi, Shi Hyeong Kim, Kang Min Kim, Chang Jun Lee, Youn Tae Kim, Xavier Lepró, Ray H. Baughman and Seon Jeong Kim\*

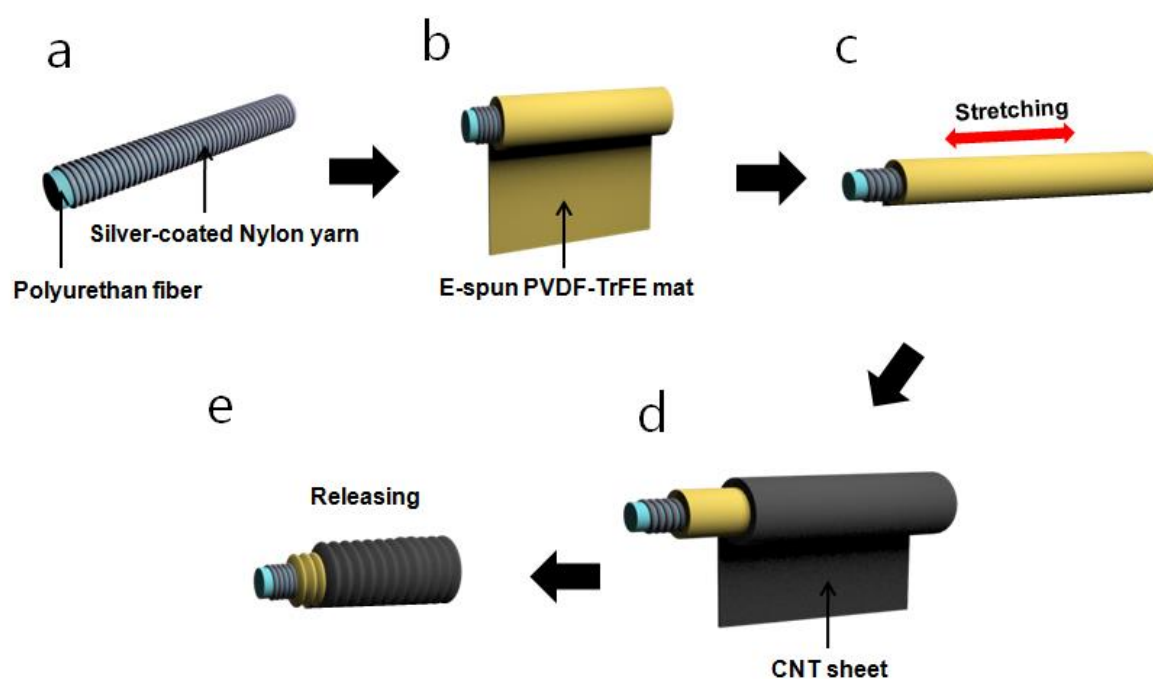

**Figure S1.** The fabrication process of the stretchable triboelectric fiber.

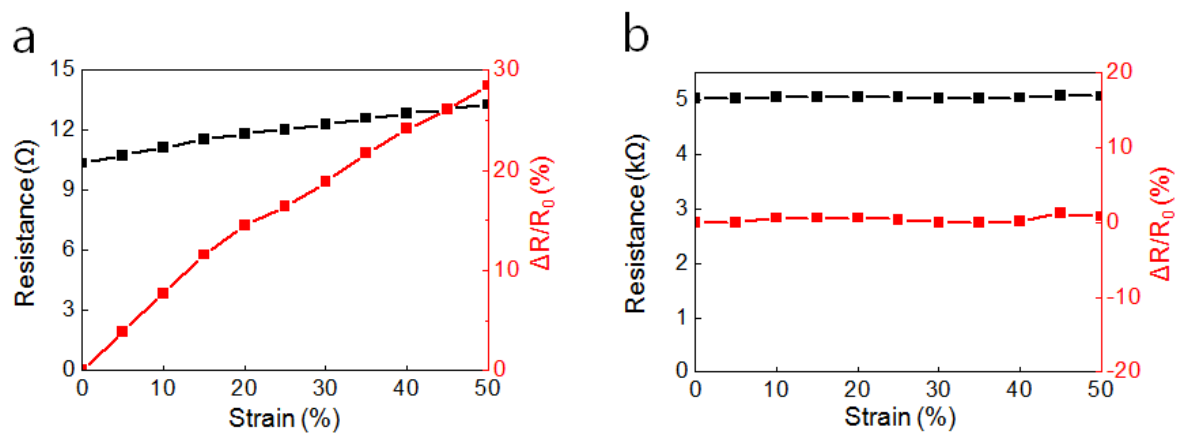

**Figure S2.** Resistance variation in longitudinal strain of **a**, 10 mm silver-coated nylon/PU fiber and **b**, 10 mm wrinkled PVDF-TrFE/CNT shell.

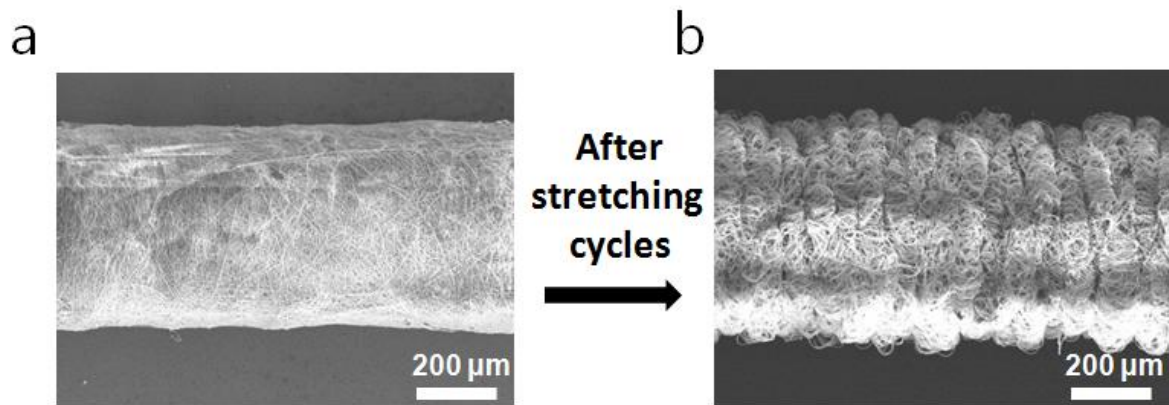

**Figure S3.** SEM image of the PVDF-TrFE/silver-coated nylon/PU fiber: **a**, initial state and **b**, after stretching cycles.

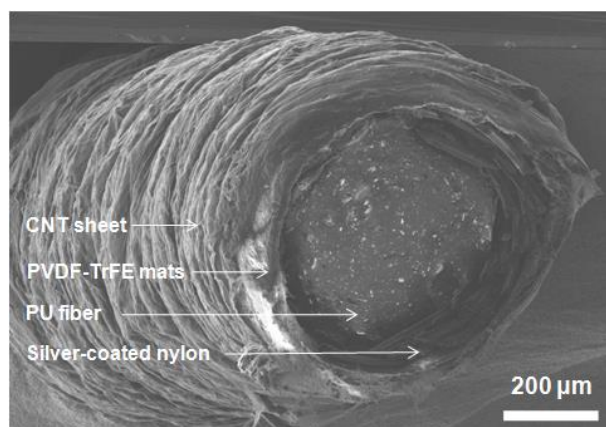

**Figure S4.** SEM image of the cross-section of stretchable triboelectric fiber

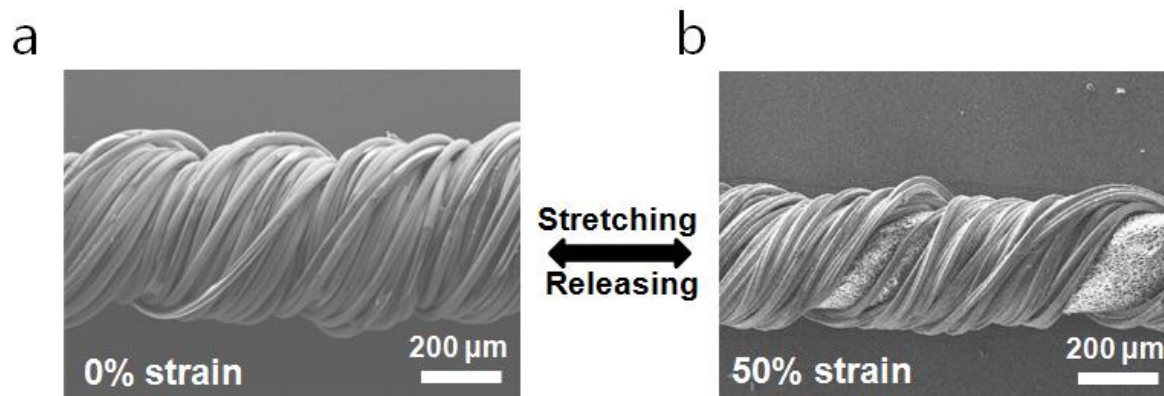

**Figure S5.** SEM image of the silver-coated nylon/PU fiber : **a**, initial state and **b**, stretching at 50% strain.

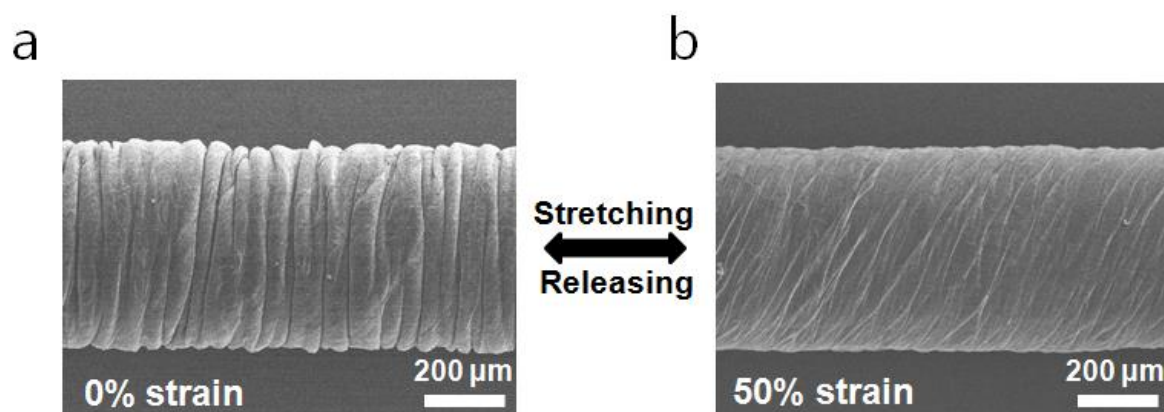

**Figure S6.** SEM image of the stretchable triboelectric fiber: **a**, initial state and **b**, stretching at 50% strain.

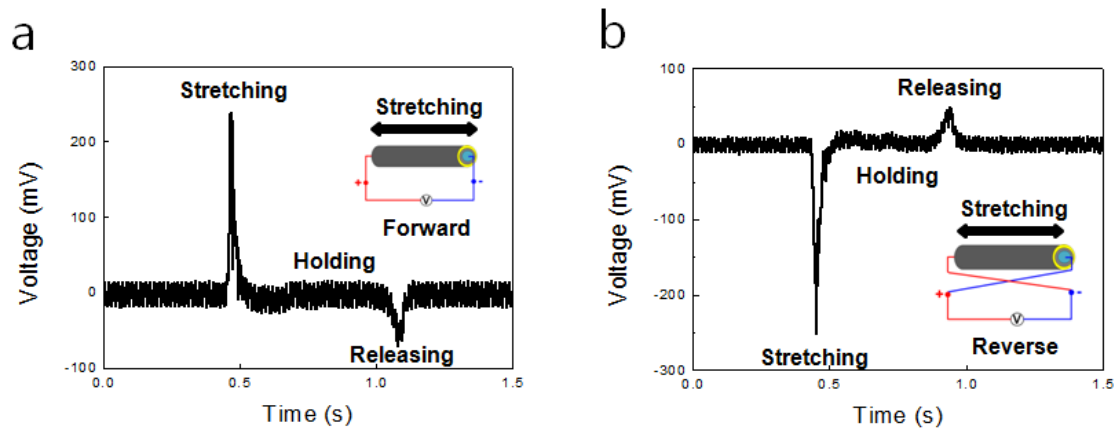

**Figure S7.** The open circuit voltage of 50 mm stretchable triboelectric fiber in **a**, forward connection and **b**, reversed connection during stretching by hand.

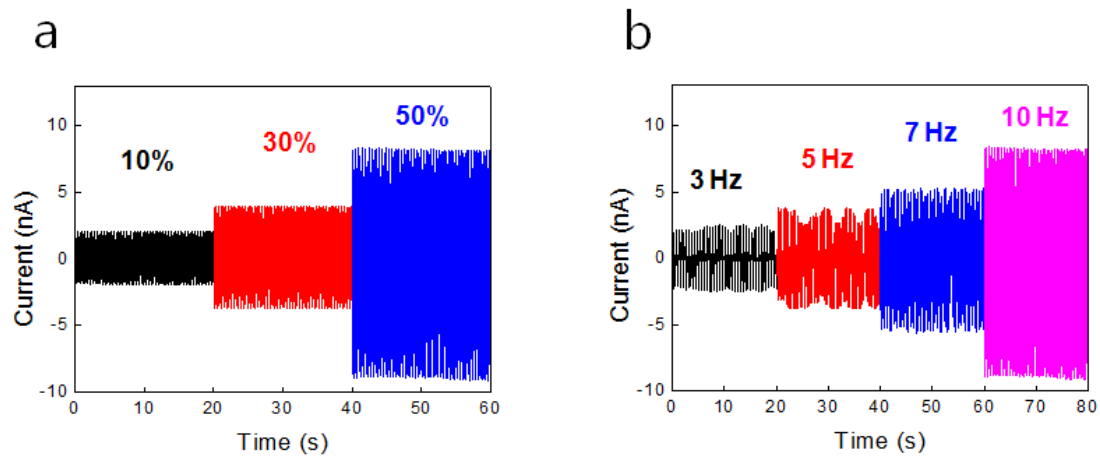

**Figure S8.** The current response was measured for **a**, varying strain ranging from 10% to 50% with a frequency of 10 Hz and **b**, varying frequency from 3 Hz to 10 Hz at an applied strain of 50%.



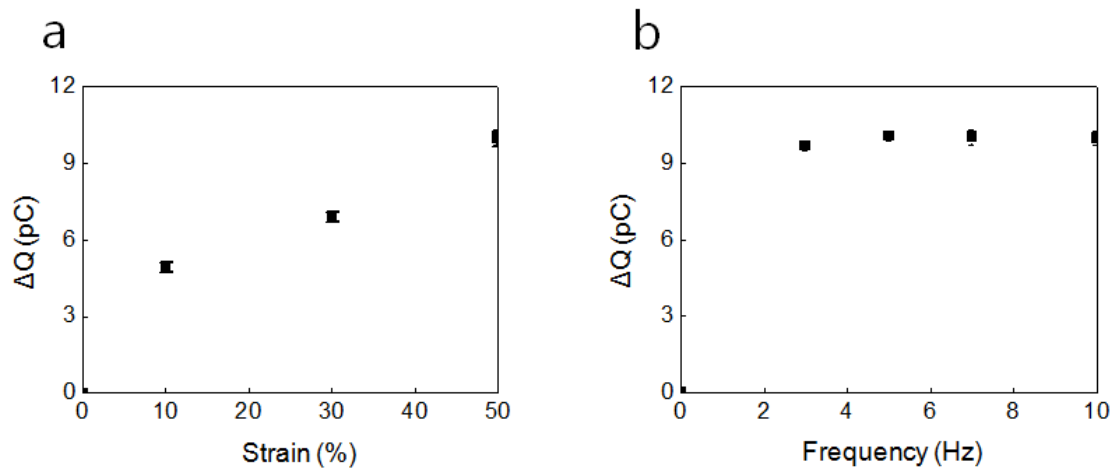

**Figure S9.** Variation in integral transferred charges of 3mm stretchable triboelectric fiber with **a**, applied strain of 10%, 30%, and 50% for a given frequency of 10 Hz and **b**, applied frequency of 3, 5, 7, and 10 Hz for a given strain of 50%.

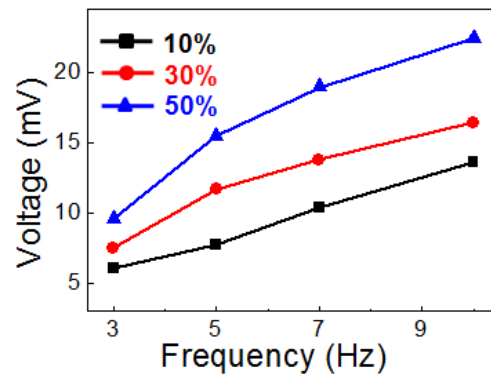

**Figure S10.** Voltage response of 3mm stretchable triboelectric fiber with different strains and frequencies.

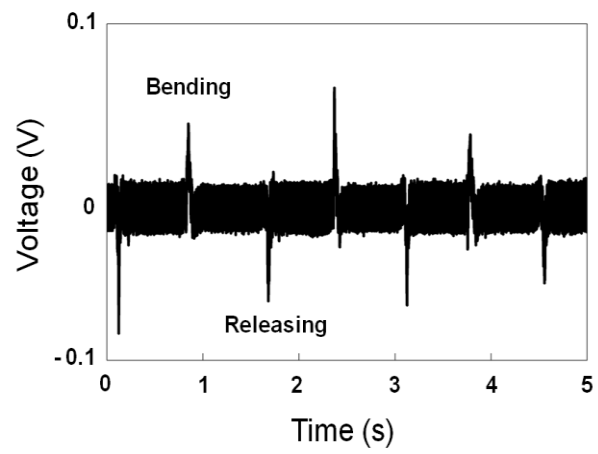

**Figure S11.** Current response of the triboelectric fiber in a textile when triboelectric fiber is in bending and releasing state.
